# Supplementary material for: The design and synthesis of nonlinear optical chromophores containing two short chromophores for an enhanced electro-optic activity
Source: Royal Society of Chemistry journal article supplement (doi:10.1039/d0ma00677g), 2020-12-11
Supplement: d0ma00677g1.pdf [file d0ma00677g1.pdf]

## Electronic supplementary information (ESI)

### Design and synthesis of nonlinear optical chromophores containing two short chromophores for enhanced electro-optic activity

Fenggang Liu <sup>a\*</sup>, Gangzhi Qin <sup>a</sup>, Ziheng Li <sup>a</sup>, Ziwei Wang <sup>a</sup>, Meishan Peng <sup>a</sup>, Shuangke Wu <sup>a</sup>, Chunlin Li <sup>a</sup> and Yuhui Yang <sup>b</sup>.

<sup>a</sup>School of Chemistry and Chemical Engineering, Guangzhou University, Guangzhou 510006, P. R. China. E-mail address: liufg6@gzhu.edu.cn

<sup>b</sup>College of Materials Science and Engineering, Zhejiang Sci-Tech University, Hangzhou, 310018, PR China. E-mail address: yhyang@zstu.edu.cn

#### 1. Optical properties

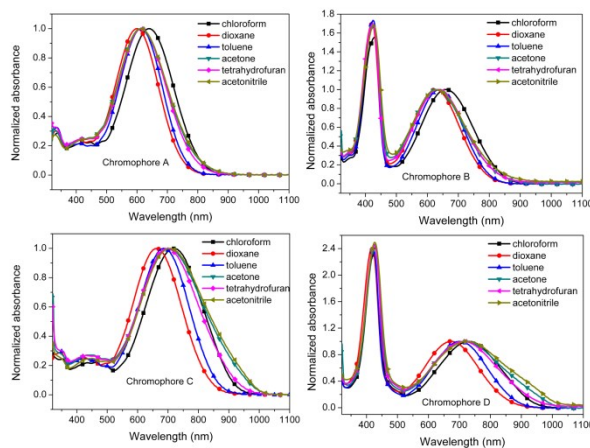

Fig. S1 UV-Vis absorption spectra of chromophores A-D in six kinds of aprotic solvents with varying dielectric constants.

## 2. Frontier molecular orbitals

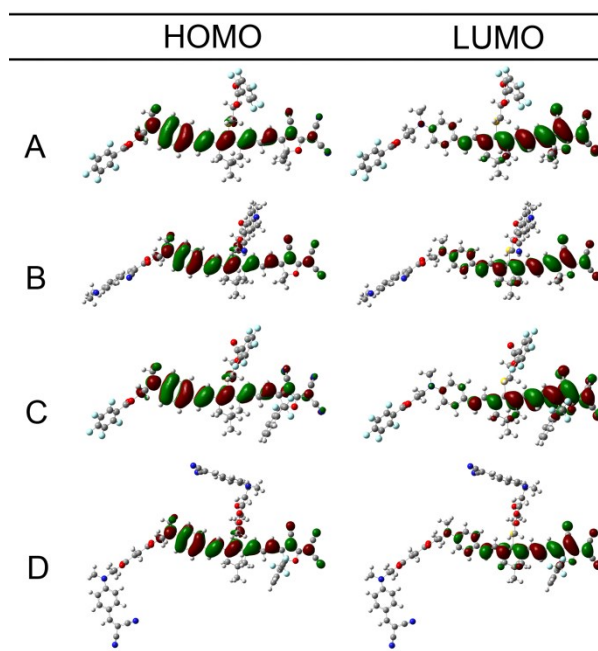

Fig. S2 Frontier molecular orbitals HOMO and LUMO of chromophores A-D.

## 3. Artist's concept of poling process

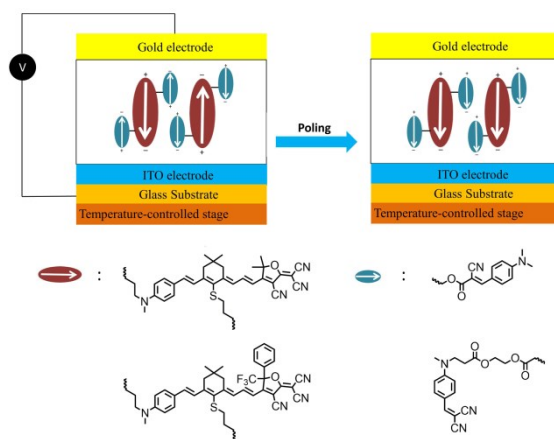

Fig. S3 Artist's concept of poling process of chromophores B and D.
